# Supplementary material for: A plasmonic biosensor array by block copolymer lithography
Source: Royal Society of Chemistry journal article supplement (doi:10.1039/c0jm01319f), 2010-01-01
Supplement: c0jm01319f.pdf [file c0jm01319f.pdf]

## Supplementary Information

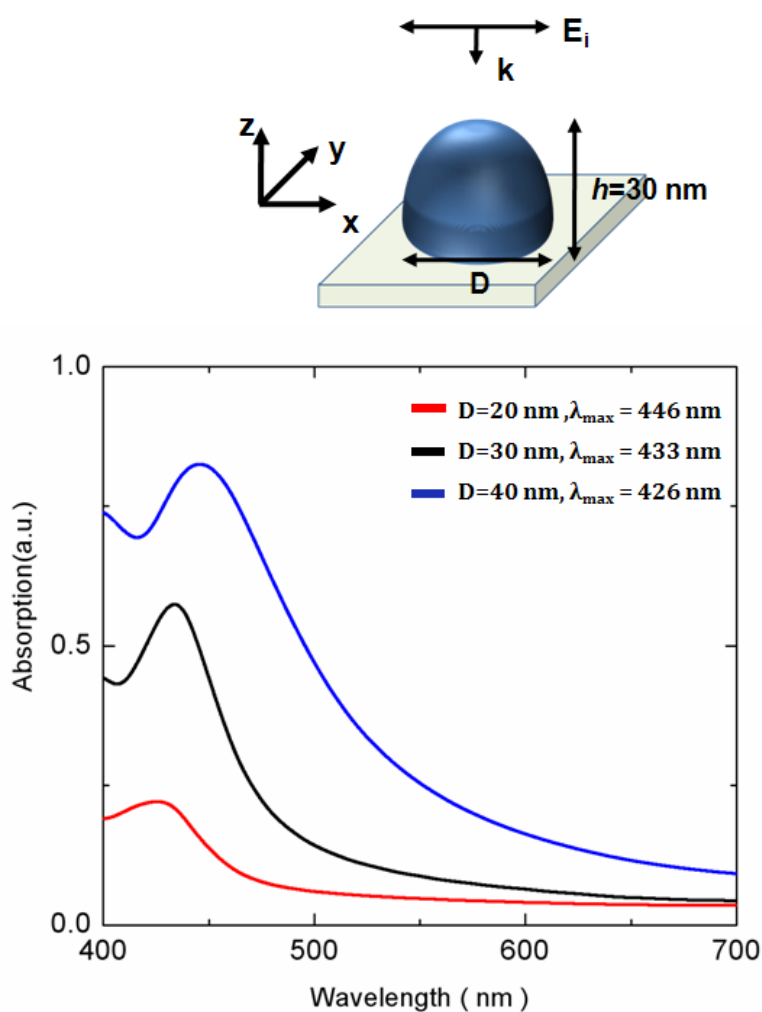

**Fig. S1** Schematic diagram and simulated absorption spectra of the conical Ag nanoparticles with different diameters. The nanoparticle shape was assumed to be parabolic, defined by  $z = -a(x^2+y^2)+b$ . The simulation of LSPR was carried out with a three dimensional finite-difference time-domain (FDTD) calculation. The Ag nanoparticle is illuminated with a linearly polarized plane wave, which propagates in the  $k = -z$  direction (normal incident). A grid size of 1 nm was used in this simulation.

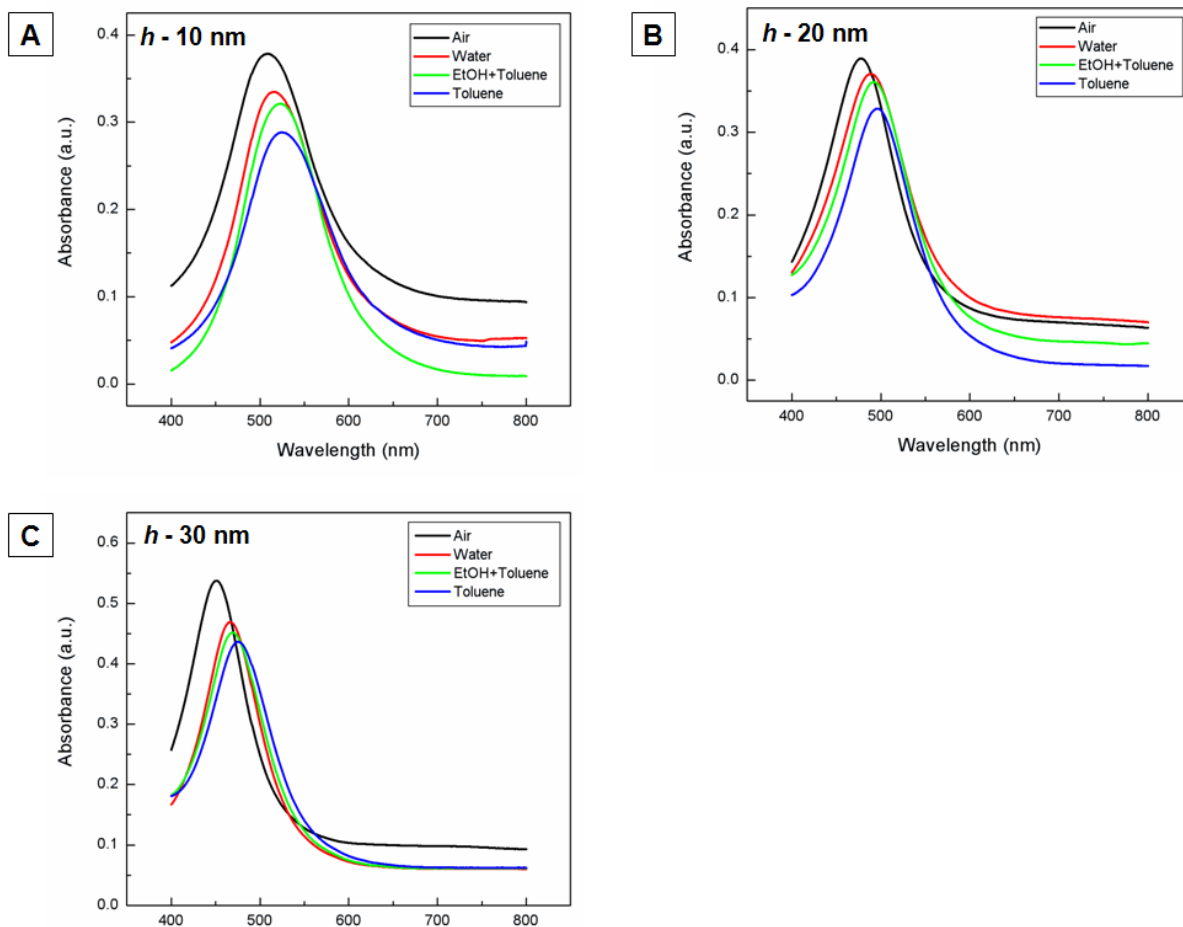

**Fig. S2** The LSPR absorbance spectra of Ag nanoparticle arrays measured in air ( $n=1$ ), in water ( $n=1.33$ ), in 1:1(v/v) ethanol/toluene mixture ( $n=1.429$ ), and in toluene ( $n=1.495$ ) for various nanoparticle heights from (a) 10 nm, (b) 20 nm, to (c) 30 nm. A gradual red-shift occurred as the refractive index of the surrounding medium increased from 1 to 1.5.
